# Supplementary material
Source: publisher figshare collection journal article supplement (https://karger.figshare.com/ndownloader/files/12753521)
Supplement: Supplementary file 1 [file 12753521]

**Supplemental Material**

**Supplemental Figure 1:** In our model, the overall MaR is a proxy for the amplitude of the frontal plane (vertical) projection, which is denoted by the black bar. The long axis of the heart (thick dashed line), which runs perpendicular to the value plane (thin dashed line) provides the directional component. To determine the position of the heart in relation to the thoracic cavity, we computed the anterior/posterior angle between the reference axis and the anterior/posterior chest wall. The frontal plane projection of the inferior wall ischemia can thus be expressed as: MaR * cosine(angle).
